# Supplementary material for: Interactions of artificial lakes with groundwater applying an integrated MODFLOW solution
Source: Springer Nature journal article supplement (doi:10.1007/s10040-017-1641-x), 2017-09-14
Supplement: MOESM1 [file 15060570]

Interactions of artificial lakes with groundwater applying an integrated MODFLOW solution

A. El-Zehairy<sup>1,2</sup>, M.W. Lubczynski<sup>1\*</sup>, J. Gurwin<sup>3</sup>

<sup>1</sup> Department of Water Resources, Faculty of Geo-Information Science and Earth Observation (ITC) University of Twente, P.O. Box 217, 7500 AE Enschede, The Netherlands

<sup>2</sup> Irrigation & Hydraulic Engineering Dept., Faculty of Engineering, Mansoura Univ., Mansoura 35516, Egypt. Tel: +20 100 300 6515 Fax: +20 50 224 4690 E-mail: [el\\_zehairy@mans.edu.eg](mailto:el_zehairy@mans.edu.eg)

<sup>3</sup> Department of Applied Hydrogeology, Institute of Geological Sciences, University of Wroclaw, Poland

\* Corresponding author: [m.w.lubczynski@utwente.nl](mailto:m.w.lubczynski@utwente.nl)

**Table S1:** Water balance of the whole model domain; the symbols follow Equation 1 of the main article; IN is the total water input; OUT is the total water output; each hydrologic year starts from 1<sup>st</sup> November of the previous year and ends 31<sup>st</sup> October of the year as listed; all values are in mm yr<sup>-1</sup>.

| Hydrologic year | IN           |               |             | IN            | OUT          |               |             | OUT           | $\Delta S$  | $\frac{A_{LK}}{(km^2)}$ | $\frac{A_{LD}}{(km^2)}$ |
|-----------------|--------------|---------------|-------------|---------------|--------------|---------------|-------------|---------------|-------------|-------------------------|-------------------------|
|                 | $P$          | $Q_{in}$      | $GHB_{in}$  |               | ET           | $Q_{out}$     | $GHB_{out}$ |               |             |                         |                         |
| 2005            | 481.3        | 2750.4        | 67.6        | 3299.3        | 565.9        | 2713.0        | 12.4        | 3291.3        | 8.0         | 13.9                    | 60.9                    |
| 2006            | 552.5        | 3478.6        | 70.0        | 4101.1        | 576.9        | 3505.4        | 11.8        | 4093.1        | 8.0         | 13.1                    | 61.7                    |
| 2007            | 685.4        | 3472.8        | 68.2        | 4226.4        | 656.2        | 3470.0        | 13.0        | 4139.2        | 87.2        | 14.0                    | 60.8                    |
| 2008            | 614.2        | 2345.8        | 63.4        | 3023.4        | 561.8        | 2303.5        | 13.0        | 2878.3        | 145.1       | 13.0                    | 61.8                    |
| <i>Mean</i>     | <i>583.4</i> | <i>3011.4</i> | <i>67.3</i> | <i>3662.1</i> | <i>589.0</i> | <i>2997.5</i> | <i>12.6</i> | <i>3600.0</i> | <i>62.1</i> | <i>13.5</i>             | <i>61.3</i>             |

where:  $P$  – precipitation rate,  $Q_{in}$  – stream inflows at the inlet of the modelled area,  $Q_{out}$  – stream outflows at the outlet of the modelled area,  $GHB_{in}$  – lateral groundwater inflow into the modelled area across the GHB boundaries,  $GHB_{out}$  – lateral groundwater outflow from the modelled area across the GHB boundaries, ET – total evapotranspiration consisting of land surface evapotranspiration ( $ET_{LD}$ ) and lake evaporation ( $E_{LK}$ ), and  $\Delta S$  - total change of storage.  $A_{LK}$  and  $A_{LD}$  – lake area and land surface area.

**Table S2:** Water balance of the lake referenced to the variable lake area (see Table S1); the symbols follow Equation 4 of the main article, while IN is the total lake input and OUT is the total lake output; each hydrologic year starts from 1<sup>st</sup> November of the previous year and ends 31<sup>st</sup> October of the year as listed; all values are in mm yr<sup>-1</sup>.

| Hydrologic year | IN           |              |                |             | IN             | OUT          |                |              | OUT            | $\Delta S_{LK}$ |
|-----------------|--------------|--------------|----------------|-------------|----------------|--------------|----------------|--------------|----------------|-----------------|
|                 | $P$          | $Ro$         | $Q_{LKin}$     | $L_{LKin}$  |                | $E_{LK}$     | $Q_{LKout}$    | $L_{LKout}$  |                |                 |
| 2005            | 481.3        | 184.5        | 15167.5        | 25.8        | 15859.1        | 915.7        | 14631.8        | 149.6        | 15697.1        | 163.5           |
| 2006            | 552.5        | 185.1        | 20131.6        | 37.7        | 20906.9        | 939.4        | 19928.5        | 144.5        | 21012.4        | -106.2          |
| 2007            | 685.4        | 262.3        | 18926.4        | 28.9        | 19903.0        | 906.6        | 18531.4        | 148.5        | 19586.5        | 317.1           |
| 2008            | 614.2        | 249.6        | 13885.4        | 47.2        | 14796.4        | 694.2        | 13234.6        | 94.4         | 14023.2        | 771.4           |
| <i>Mean</i>     | <i>583.4</i> | <i>220.4</i> | <i>17025.6</i> | <i>34.9</i> | <i>17864.2</i> | <i>863.9</i> | <i>16579.3</i> | <i>134.2</i> | <i>17577.4</i> | <i>286.8</i>    |

where:  $Ro$  – total surface runoff into the lake,  $Q_{LKin}$  – stream inflows (rivers and drains) at the inlet of the lake,  $Q_{LKout}$  – stream outflows at the outlet of the lake,  $L_{LKin}$  – seepage of groundwater into the lake,  $L_{LKout}$  – seepage from the lake into groundwater and  $\Delta S_{LK}$  - is the lake storage change.

**Table S3:** Water balance of the surface and unsaturated zone referenced to the variable land area (see Table S1); the symbols follow Equation 6 of the main article; each hydrologic year starts from 1<sup>st</sup> November of the previous year and ends 31<sup>st</sup> October of the year as listed; all values are in mm yr<sup>-1</sup>.

| Hydrologic year | IN           |             |              | OUT         |              |              |             | OUT          | $\Delta S_{uz}$ |
|-----------------|--------------|-------------|--------------|-------------|--------------|--------------|-------------|--------------|-----------------|
|                 | $P$          | $Exf_{gw}$  | $IN$         | $R_g$       | $ET_{uz}$    | $I$          | $Ro$        |              |                 |
| 2005            | 481.3        | 34.0        | 515.3        | 59.3        | 293.3        | 131.4        | 42.1        | 526.1        | -10.8           |
| 2006            | 552.5        | 34.1        | 586.6        | 66.9        | 287.6        | 150.8        | 39.3        | 544.6        | 41.9            |
| 2007            | 685.4        | 45.8        | 731.2        | 120.7       | 337.2        | 187.1        | 60.4        | 705.4        | 25.8            |
| 2008            | 614.2        | 34.7        | 648.9        | 89.2        | 308.8        | 167.7        | 52.5        | 618.2        | 30.7            |
| <i>Mean</i>     | <i>583.4</i> | <i>37.1</i> | <i>620.5</i> | <i>84.0</i> | <i>306.7</i> | <i>159.3</i> | <i>48.6</i> | <i>598.6</i> | <i>21.9</i>     |

where:  $Exf_{gw}$  – groundwater exfiltration to land surface,  $R_g$  – gross recharge,  $ET_{uz}$  – unsaturated zone evapotranspiration,  $I$  - canopy interception and  $\Delta S_{uz}$  - storage change of unsaturated zone.

**Table S4:** Water balance of the saturated zone referenced to the total modelled area; the symbols follow Equation 9 of the main article; each hydrologic year starts from 1<sup>st</sup> November of the previous year and ends 31<sup>st</sup> October of the year as listed; all values are in mm yr<sup>-1</sup>.

| Hydrologic year | IN          |            |             |             | IN           | OUT         |             |            |             |             | OUT          | $\Delta S_g$ |
|-----------------|-------------|------------|-------------|-------------|--------------|-------------|-------------|------------|-------------|-------------|--------------|--------------|
|                 | $GHB_{in}$  | $Q_{GWin}$ | $L_{LKout}$ | $R_g$       |              | $GHB_{out}$ | $Q_{GWout}$ | $L_{LKin}$ | $ET_g$      | $Exf_{gw}$  |              |              |
| 2005            | 67.6        | 9.3        | 27.8        | 48.3        | 153.0        | 12.4        | 59.3        | 4.8        | 50.0        | 27.7        | 154.2        | -1.2         |
| 2006            | 70.0        | 10.0       | 25.3        | 55.2        | 160.5        | 11.8        | 55.5        | 6.6        | 49.8        | 28.1        | 151.8        | 8.7          |
| 2007            | 68.2        | 9.6        | 27.8        | 98.1        | 203.7        | 13.0        | 64.7        | 5.4        | 60.3        | 37.2        | 180.6        | 23.1         |
| 2008            | 63.4        | 9.3        | 16.4        | 73.7        | 162.8        | 13.0        | 60.1        | 8.2        | 47.5        | 28.7        | 157.5        | 5.3          |
| <i>Mean</i>     | <i>67.3</i> | <i>9.5</i> | <i>24.3</i> | <i>68.8</i> | <i>170.0</i> | <i>12.6</i> | <i>59.9</i> | <i>6.3</i> | <i>51.9</i> | <i>30.4</i> | <i>161.0</i> | <i>9.0</i>   |

where:  $Q_{GWin}$  – stream seepage to groundwater,  $Q_{GWout}$  – groundwater seepage to streams,  $R_g$  – gross recharge,  $ET_g$  – groundwater evapotranspiration and  $\Delta S_g$  – storage change of saturated zone.
